# Supplementary material for: Design of a Waterborne Polyurethane–Urea Ink for Direct Ink Writing 3D Printing
Source: MDPI journal article supplement (doi:10.3390/ma14123287), 2021-06-14
Supplement: s1 [file s1]

## Design of a Waterborne Polyurethane–Urea Ink for Direct Ink Writing 3D Printing

Julen Vadillo <sup>1,2</sup>, Izaskun Larraza <sup>1</sup>, Tamara Calvo-Correas <sup>1</sup>, Nagore Gabilondo <sup>1</sup>, Christophe Derail <sup>2,\*</sup> and Arantxa Eceiza <sup>1,\*</sup>

<sup>1</sup> Materials + Technologies Research Group (GMT), Department of Chemical and Environmental Engineering, Faculty of Engineering of Gipuzkoa, University of Basque Country, Plz. Europa 1, 20018 Donostia-San Sebastian, Spain; julen.vadillo@univ-pau.fr (J.V.); izaskun.larraza@ehu.eus (I.L.); tamara.calvo@ehu.eus (T.C.-C.); nagore.gabilondo@ehu.eus (N.G.)

<sup>2</sup> E2S UPPA, IPREM, UMR5254, Centre National de la Recherche Scientifique (CNRS), Institut des Sciences Analytiques & de PhysicoChimie pour l'Environnement & les Matériaux, Université de Pau et Pays de l'Adour, 64000 Pau, France

\* Correspondence: christophe.derail@univ-pau.fr (C.D.); arantxa.eceiza@ehu.eus (A.E.)

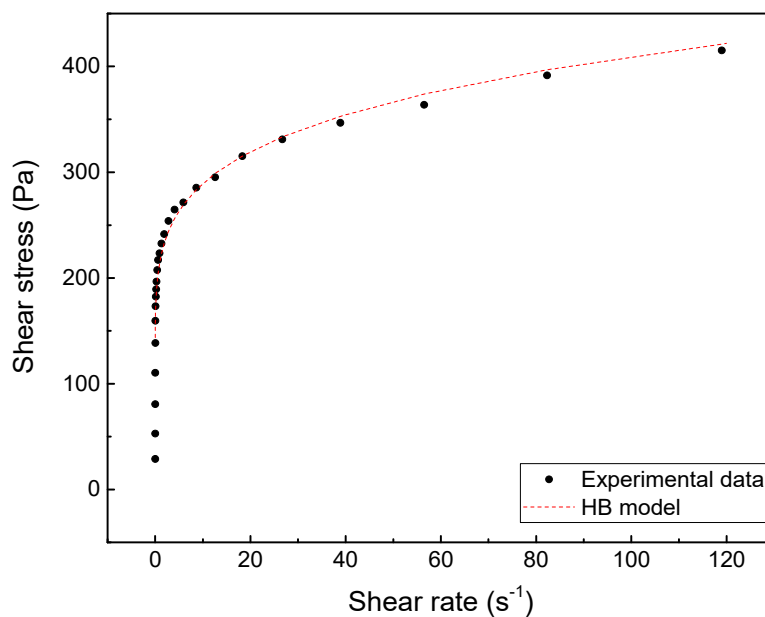

**Figure S1.** Adjustment to the Herschel-Bulkley model of WBPUU29 flow curve.

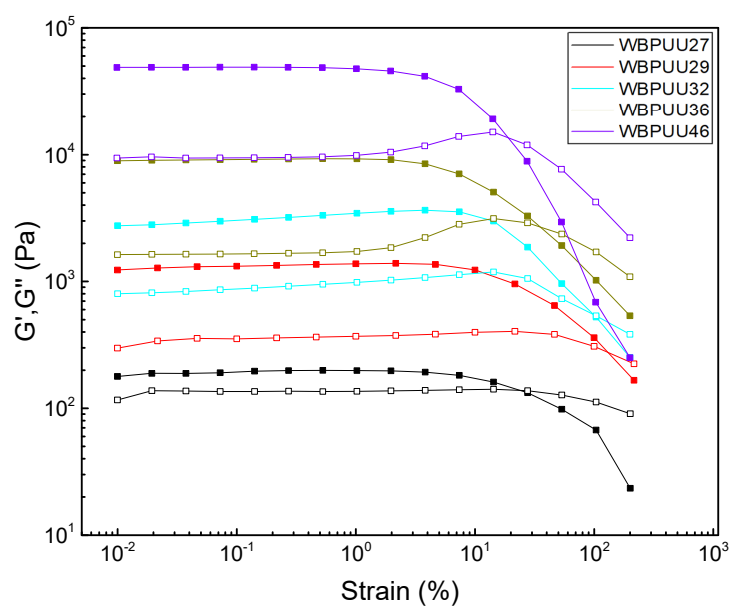

**Figure S2.**  $G'$  (■) and  $G''$  (□) as a function of strain ( $T = 22.5$  °C) of WBPUU inks with different solid content at 1Hz.
